# Supplementary material
Source: PubMed Central journal article supplement (PMC5821174)
Supplement: jciinsight-3-95417-s001.pdf [file jciinsight-3-95417-s001.pdf]

## List of Supplemental Material

1. Supplemental Figure 1. Purity and viability of CD14<sup>+</sup> monocytes harvested using a negative immunomagnetic sorting strategy.
2. Supplemental Figure 2. Decreased CX3CR1 surface expression in cultured monocytes results in abrogation of the CX3CL1-mediated rescue of cell survival following serum starvation.
3. Supplemental Figure 3. The *CX3CR1-M280/M280* mutation does not affect blood neutrophil levels at steady state.

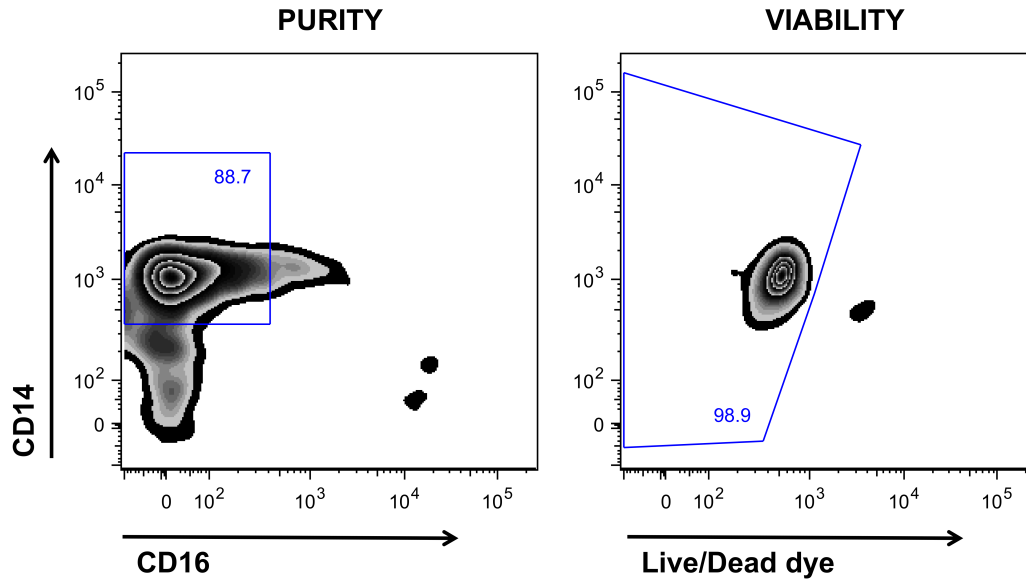

**Supplemental Figure 1. Purity and viability of CD14<sup>+</sup> monocytes harvested using a negative immunomagnetic sorting strategy.** Shown are representative FACS plots demonstrating the purity (left panel) and viability (right panel) of CD14<sup>+</sup> monocytes used in the study.

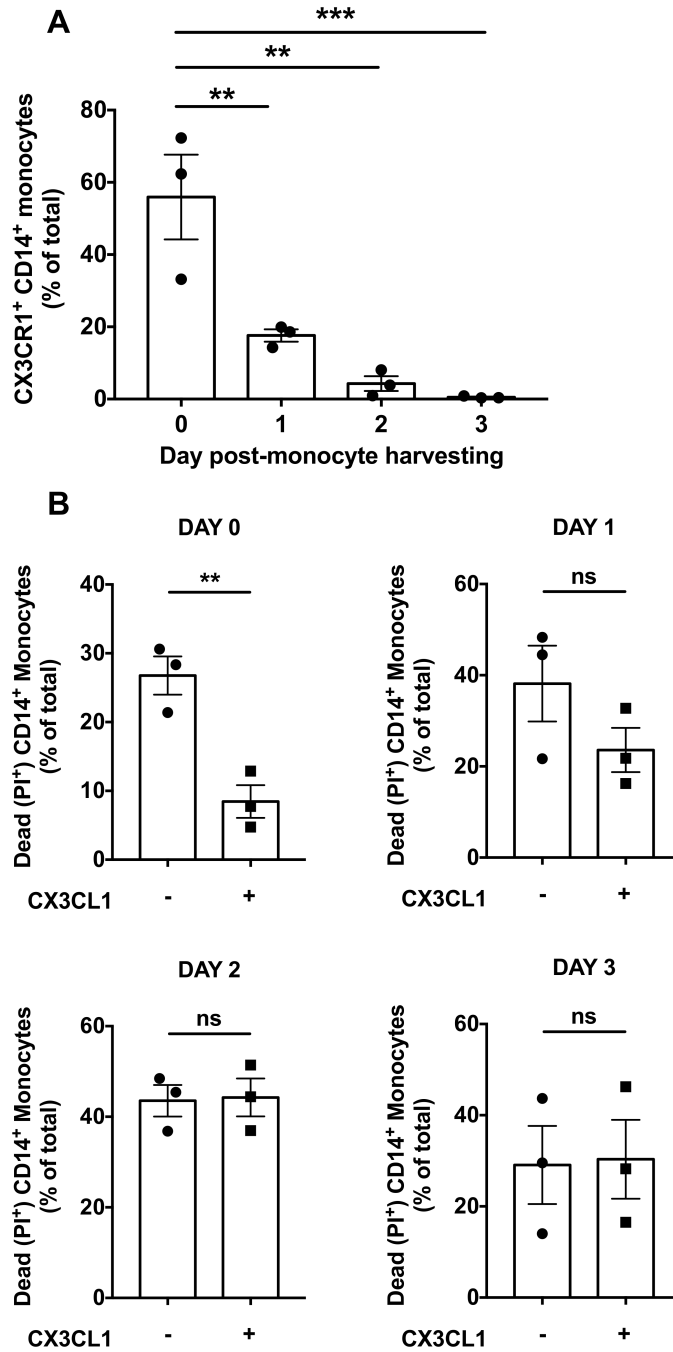

**Supplemental Figure 2. Decreased CX3CR1 surface expression in cultured monocytes results in abrogation of the CX3CL1-mediated rescue of cell survival following serum starvation.** Shown are summary data of (A) CX3CR1 expression in monocytes at days 0, 1, 2 and 3 after harvesting and culture and (B) the effects of

CX3CL1 in ameliorating serum starvation-induced cell death at the corresponding time-points.  $n = 3$ .  $**P < 0.01$ ;  $***P < 0.001$ . Statistical analysis was performed using one-way ANOVA with Tukey's multiple comparisons test (A) or unpaired t test (B). Data represent the mean  $\pm$  SEM.

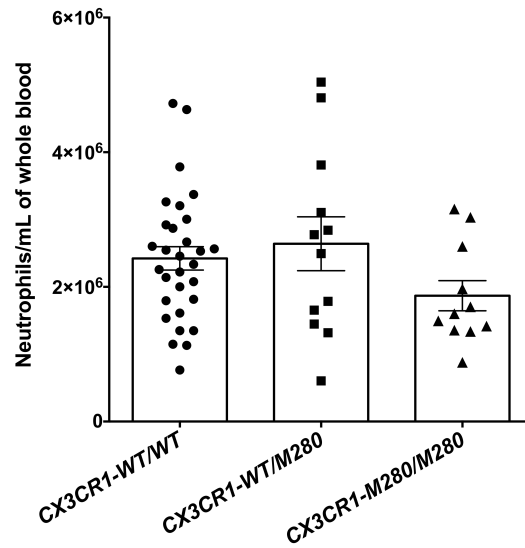

**Supplemental Figure 3. The *CX3CR1-M280/M280* mutation does not affect blood neutrophil levels at steady state.** *CX3CR1-M280/M280* healthy donors have similar neutrophil counts at steady state compared to *CX3CR1-WT/WT* and *CX3CR1-WT/M280* healthy donors. n = 11-30. Statistical analysis was performed using one-way ANOVA with Tukey's multiple comparisons test. Data represent the mean ± SEM.
